# Supplementary material for: Identification of a Devernalization Inducer by Chemical Screening Approaches in Arabidopsis thaliana
Source: PubMed Central journal article supplement (PMC7890032; doi:10.3389/fpls.2021.634068), 2021-02-04
Supplement: Data_Sheet_1.pdf [file Data_Sheet_1.pdf]

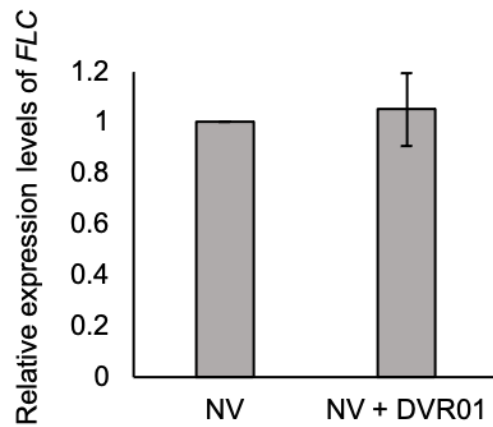

**Supplementary Figure 1** | DVR01 did not affect the expression levels of *FLC* in NV plants. The expression levels of *FLC* were quantified in 7-day-old seedlings of NV plants and DVR01-treated NV plants. No statistical significance was detected. Error bars denote SD. Two-tailed Student's t-test was performed.

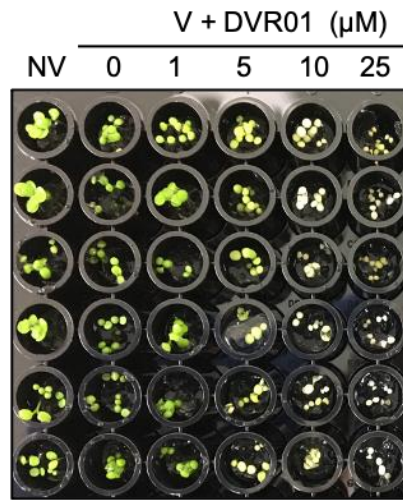

**Supplementary Figure 2** | Plant morphologies of DVR01-treated plants. Photographs of 7-day-old seedlings treated with various concentrations of DVR01. DVR01 induced retarded growth in a concentration-dependent manner.

A

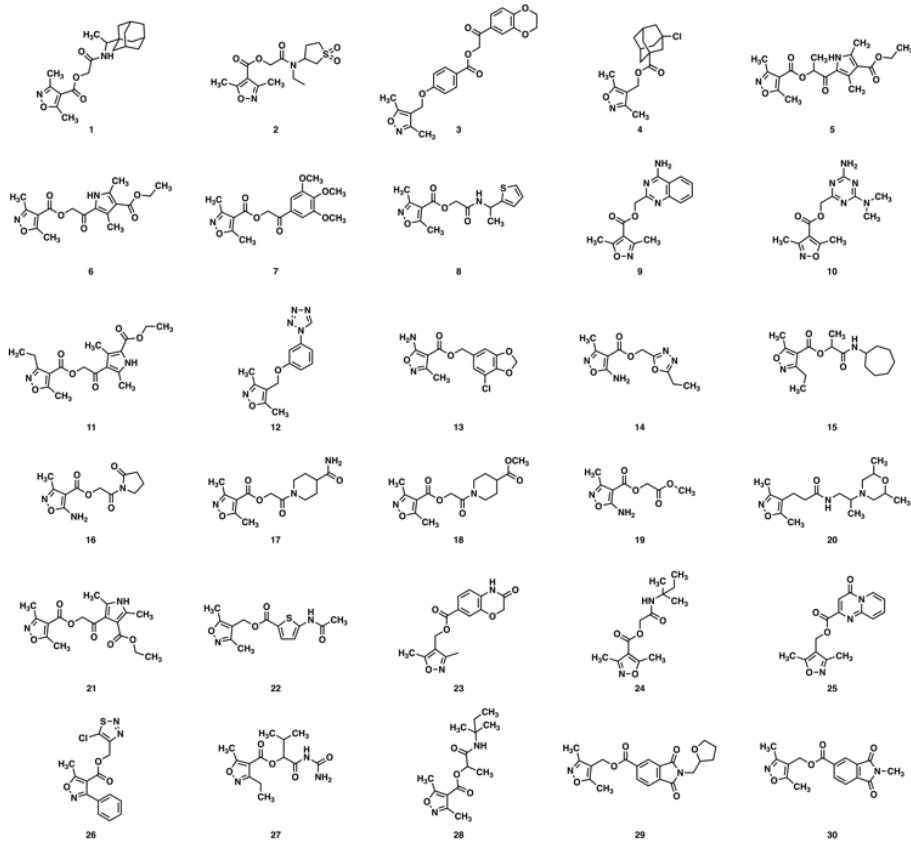

B

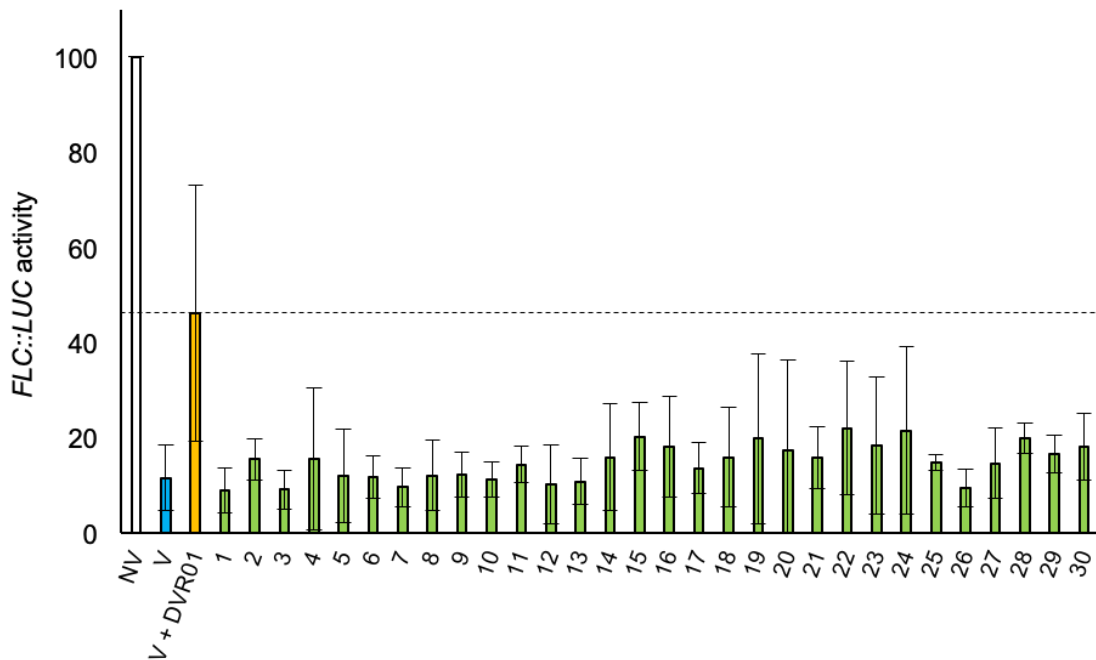

**Supplementary Figure 3** | *FLC::LUC* activities in V plants treated with analogous compounds of DVR01. (A) Chemical structures of 30 analogous compounds of DVR01. (B) *FLC::LUC* activities were measured in V plants treated with 30 analogous

compounds of DVR01. Compounds at 10  $\mu$ M were used. Compared with these plants, DVR01-treated V plants showed the highest activity of *LUC*. Error bars represent SD.

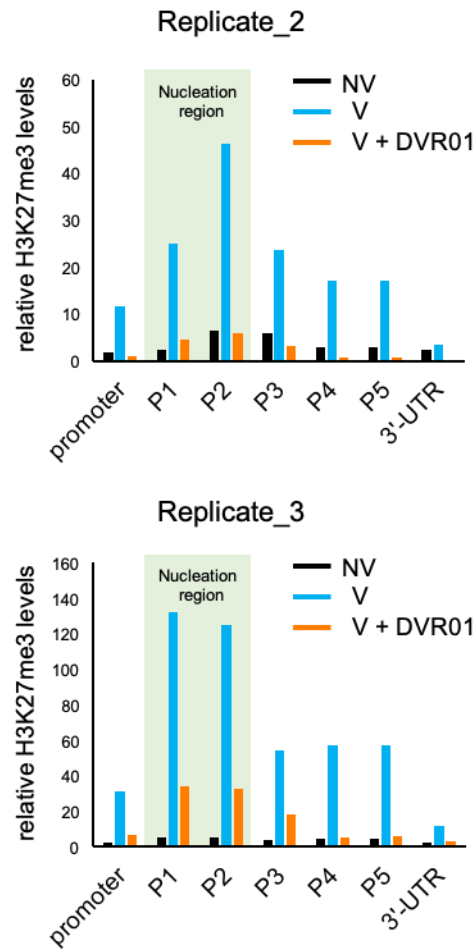

**Supplementary Figure 4** | Three replicates of ChIP-qPCR analysis of H3K27me3. The accumulation levels of H3K27me3 in NV-, V-, and DVR01-treated V plants. The P1 and P2 regions are located in the nucleation region (light green). Relative values are normalized by the negative control TA3.

**Supplementary Table 1 | Primers used in this study**

| Primers for qPCR | Sequence                         |
|------------------|----------------------------------|
| <i>PP2A</i> (Fw) | 5'-TATCGGATGACGATTCTTCGTGCAG-3'  |
| <i>PP2A</i> (Rv) | 5'-GCTTGGTCGACTATCGGAATGAGAG-3'  |
| <i>FLC</i> (Fw)  | 5'-CCGAACTCATGTTGAAGCTTGTTGAG-3' |
| <i>FLC</i> (Rv)  | 5'-CGGAGATTTGTCCAGCAGGTG-3'      |

| Primers for ChIP-qPCR    | Sequence                        |
|--------------------------|---------------------------------|
| <i>FLC-promoter</i> (Fw) | 5'-ACTATGTAGGCACGACTTTGGTAAC-3' |
| <i>FLC-promoter</i> (Rv) | 5'-TGCAGAAAGAACCTCCACTCTAC-3'   |
| <i>FLC-p1</i> (Fw)       | 5'-CGACAAGTCACCTTCTCCAAA-3'     |
| <i>FLC-p1</i> (Rv)       | 5'-AGGGGGAACAAATGAAAACC-3'      |
| <i>FLC-p2</i> (Fw)       | 5'-GTCGCTCTTCTCGTCGCTC-3'       |
| <i>FLC-p2</i> (Rv)       | 5'-AGGGGGAACAAATGAAAACC-3'      |
| <i>FLC-p3</i> (Fw)       | 5'-TTCCTATCTTTGCTGTGGACCT-3'    |
| <i>FLC-p3</i> (Rv)       | 5'-GAATCGCAATCGATAACCAGA-3'     |
| <i>FLC-p4</i> (Fw)       | 5'-GTTTCCAGTGGCCTTTTCAA-3'      |
| <i>FLC-p4</i> (Rv)       | 5'-GACCAGGCTGGAGAGATGAC-3'      |
| <i>FLC-p5</i> (Fw)       | 5'-CTTTTTTCATGGCAGGATCA-3'      |
| <i>FLC-p5</i> (Rv)       | 5'-TGACATTTGATCCCACAAGC-3'      |
| <i>FLC-3'UTR</i> (Fw)    | 5'-TTGTAAAGTCCGATGGAGACG-3'     |
| <i>FLC-3'UTR</i> (Rv)    | 5'-ACTCGGCGAGAAAGTTTGTG-3'      |
| <i>TA3</i> (Fw)          | 5'-CTGCGTGGAAGTCTGTCAAA-3'      |
| <i>TA3</i> (Rv)          | 5'-CTATGCCACAGGGCAGTTTT-3'      |
